# Supplementary material for: Case-based reasoning (CBR) for multicomponent analysis using sensor arrays: Application to water quality evaluation
Source: Royal Society of Chemistry journal article supplement (doi:10.1039/b205590b), 2002-01-01
Supplement: b205590b.pdf [file b205590b.pdf]

**ELECTRONIC SUPPLEMENTARY INFORMATION**

**“Case Based Reasoning (CBR) for Multicomponent Analysis Using Sensor Arrays: Application to Water Quality Evaluation”**

M. Colilla, C.J. Fernández and E. Ruiz-Hitzky

---

**Case Based Reasoning Cycle:**

Classical CBR Cycle, including machine learning when user validates new cases solution. (See for instance, ref. 11 in the paper, i.e. J. L. Kolodner, in *Case-Based Reasoning*, ed. M. Kaufmann, San Mateo, 1993, for details).

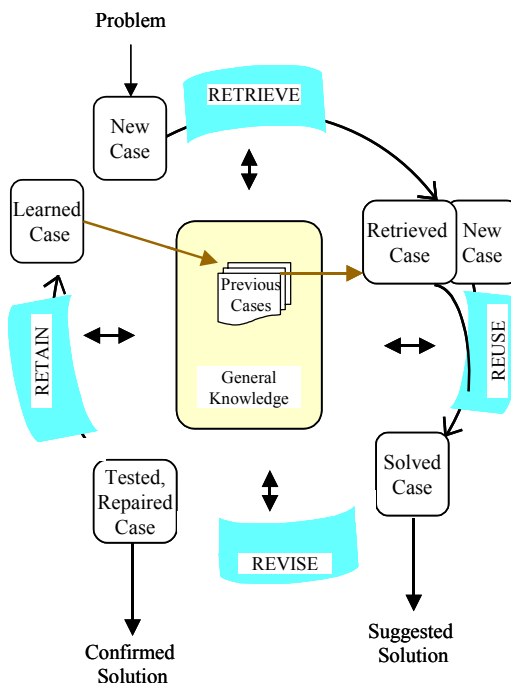

**Case Base:**

**Case Description:**

6-ISE Sensor Array:  
 $H^+$ ,  $Ca^{2+}$ ,  $Na^+$ ,  $K^+$ ,  $NO_3^-$ ,  $Cl^-$ .

**Case Solution:**

Water recognition (most similar case, MSC) and ranges of concentrations ( $mg.l^{-1}$ ) of several ionic species  $HCO_3^-$ ,  $SO_4^-$ ,  $Cl^-$ ,  $Ca^{2+}$ ,  $Mg^{2+}$ ,  $Na^+$ ,  $K^+$

### Similitude function:

Normalized distance in a 6-dimensional space:

$$fs = \sum_{i=1}^6 1 - Abs\left(\frac{(d_{1i} - d_{2i})}{\max(d_{in})}\right)$$

where 'fs' is the case similitude function, and  $d_1$  and  $d_2$  the array data of the case descriptions to compare.

### Initial Case Base Data Set:

**Table 3** Full Data-Set for Mineral water samples named W1-W20. Values of Electronic potential in mV

| Water | H <sup>+</sup> -ISE | Ca <sup>2+</sup> -ISE | Na <sup>+</sup> -ISE | K <sup>+</sup> -ISE | NO <sub>3</sub> <sup>-</sup> -ISE | Cl <sup>-</sup> -ISE |
|-------|---------------------|-----------------------|----------------------|---------------------|-----------------------------------|----------------------|
| W1    | 228.1               | -3.3                  | 72.5                 | -71.9               | 129.8                             | 188.6                |
| W2    | 213.9               | 8.0                   | 184.7                | -52.8               | 158.6                             | 140.0                |
| W3    | 235.9               | 16.2                  | 167.5                | -72.4               | 158.6                             | 179.3                |
| W4    | 203.9               | 15.2                  | 64.9                 | -91.0               | 162.5                             | 204.8                |
| W5    | 203.2               | 13.3                  | 45.0                 | -89.9               | 156.4                             | 207.8                |
| W6    | 173.3               | 1.8                   | 174                  | -57.6               | 145.6                             | 148.0                |
| W7    | 210.4               | 13.1                  | 72.6                 | -86.6               | 156.2                             | 199.9                |
| W8    | 238.2               | -2.8                  | 184.1                | -57.6               | 147.0                             | 113.1                |
| W9    | 297.4               | 21.8                  | 85.0                 | -118.1              | 178.2                             | 190.2                |
| W10   | 199.5               | 9.5                   | 66.0                 | -97.6               | 147.8                             | 196.9                |
| W11   | 239.2               | 0.6                   | 71.8                 | -91.8               | 152.0                             | 206.6                |
| W12   | 330.5               | 1.8                   | 93.5                 | -90.0               | 195.9                             | 202.8                |
| W13   | 202.6               | 3.5                   | 83.3                 | -95.4               | 141.9                             | 197.2                |
| W14   | 263.0               | -30                   | 66.4                 | -73.4               | 162.1                             | 190.3                |
| W15   | 179.1               | 1.0                   | 88.0                 | -76.2               | 142.9                             | 188.8                |
| W16   | 216.6               | 12.2                  | 57.4                 | -78.0               | 149.6                             | 194.4                |
| W17   | 292.9               | 13.0                  | 64.4                 | -74.1               | 178.3                             | 196.8                |
| W18   | 176.8               | 6.1                   | 90.0                 | -87.2               | 146.9                             | 196.6                |
| W19   | 200.0               | 10.3                  | 115.8                | -85.2               | 149.3                             | 170.0                |
| W20   | 185.9               | 14.2                  | 96.9                 | -77.6               | 149.9                             | 170.2                |

### Software:

Custom Developed Software for Real-time data acquisition and CBR processing. This software was developed in Java for Sun JRE 1.2 or compatible. This fact enable it to run the application over any platform and Operative System (Windows, UNIX, Linux, ...).
